# Supplementary material for: Metabolic network rewiring of propionate flux compensates vitamin B12 deficiency in C. elegans
Source: eLife journal article supplement (doi:10.7554/elife.17670), 2016-07-06
Supplement: supp [file elife-17670-supp-v1.zip]

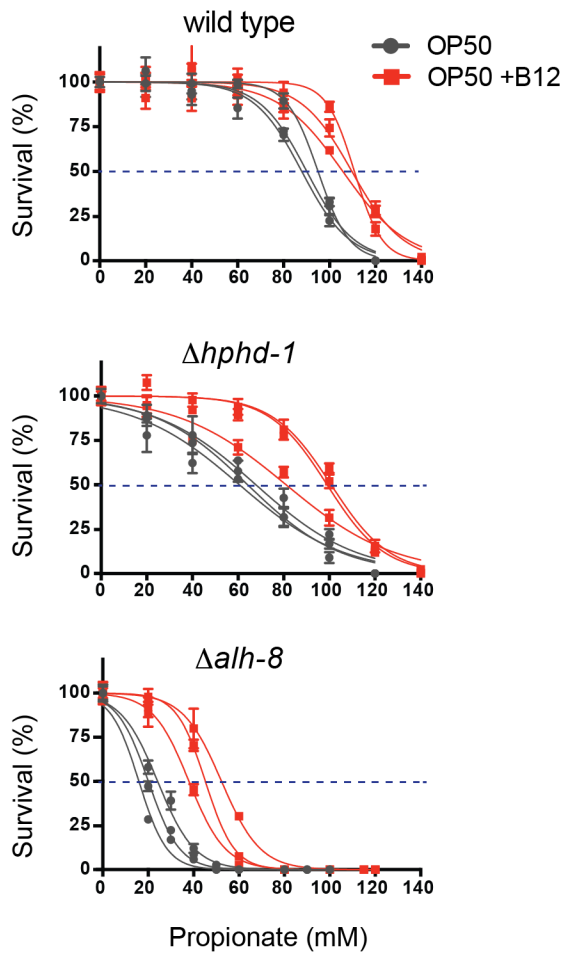

**Figure 4 Supplement.  $\Delta hphd-1$  and  $\Delta alh-8$  mutants exhibit increased sensitivity to propionate compared to wild type animals.** Three biological replicate curves are shown. Related to Figure 4C.
