# Supplementary material for: Metabolic network rewiring of propionate flux compensates vitamin B12 deficiency in C. elegans
Source: eLife. 2016 Jul 6;5:e17670. doi: 10.7554/eLife.17670 (PMC4951191; doi:10.7554/eLife.17670)
Supplement: Supplementary file 1. — The acdh-1 genotype (homozygous, heterozygous, or wild type) as determined by PCR for each F1 animal chosen from P0 pcca-1 +/+; acdh-1 +/- or pcca-1 -/-; acdh-1 +/- parents is shown, as well as an indication of whether the F1 animal laid non-viable embryos among the F2 offspring. DOI: http://dx.doi.org/10.7554/eLife.17670.011 [file elife-17670-supp1.xlsx]

## Sheet: genotype summary
summary of acdh-1 genotypes
P0 pcca-1 -/-; acdh-1 +/-						controls	P0 pcca-1 +/+; acdh-1 +/-
F1:						F1:
animal	acdh-1 +/+	acdh-1 +/-	acdh-1 -/-	dead F2 eggs?		animal	acdh-1 +/+	acdh-1 +/-	acdh-1 -/-	dead F2 eggs?
1		yes		yes		1	yes			no
2		yes		yes		2	yes			no
3		yes		yes		3		yes		no
4		yes		yes		4	yes			no
5		yes		yes		5		yes		no
6		yes		yes		6		yes		no
7	yes			no		7	yes			no
8		yes		yes		8		yes		no
9		yes		yes		9			yes	no
10		yes		yes		10		yes		no
11		yes		yes		11		yes		no
12		yes		yes		12		yes		no
13	yes			no		13		yes		no
14		yes		yes		14			yes	no
15		yes		yes		15		yes		no
16		yes		yes		16			yes	no
17		yes		yes		17		yes		no
18		yes		yes		18		yes		no
19	yes			no		19		yes		no
20		yes		yes		20		yes		no
21		yes		yes		21			yes	no
22	yes			no		22		yes		no
23		yes		yes		23		yes		no
24		yes		yes		24	yes			no
25	yes			no		25		yes		no
26		yes		yes		26			yes	no
27	yes			no		27	yes			no
28		yes		yes		28			yes	no
29		yes		yes		29		yes		no
30		yes		yes		30		yes		no
31		yes		yes		31		yes		no
32	yes			no		32	yes			no
33		yes		yes		33		yes		no
34	yes			no		34		yes		no
35		yes		yes		35			yes	no
36		yes		yes		36		yes		no
37	yes			no		37		yes		no
38		yes		yes		38		yes		no
39	yes			no		39	yes			no
40	yes			no		40		yes		no
41		yes		yes		41	yes			no
42	yes			no		42		yes		no
43	yes			no		43			yes	no
44	yes			no		44	yes			no
45		yes		yes		45			yes	no
46		yes		yes		46		yes		no
47		yes		yes		47	yes			no
48	yes			no		48			yes	no
49	yes			no		49		yes		no
50		yes		yes		50		yes		no
51		yes		yes		51			yes	no
52	yes			no		52	yes			no
53	yes			no		53		yes		no
54		yes		yes		54		yes		no
55	yes			no		55		yes		no
56	yes			no		56		yes		no
57		yes		yes		57		yes		no
58		yes		yes		58			yes	no
59	yes			no		59		yes		no
60	yes			no
61		yes		yes		totals	12	35	12
62		yes		yes		percent	20.339	59.322	20.339
63		yes		yes
64		yes		yes
65	yes			no
66		yes		yes
67		yes		yes
68		yes		yes
69		yes		yes
70		yes		yes
71		yes		yes
72	yes			no
73		yes		yes
74	yes			no
75		yes		yes
76		yes		yes
77	yes			no
78		yes		yes
79		yes		yes
80		yes		yes
81	yes			no
82		yes		yes
83	yes			no
84		yes		yes
85	yes			no
86		yes		yes
87	yes			no
88		yes		yes
89	yes			no
90		yes		yes
91		yes		yes
92		yes		yes
93		yes		yes
94		yes		yes
95		yes		yes
96	yes			no
97		yes		yes
98		yes		yes
99		yes		yes
100	yes			no
101		yes		yes
102	yes			no
103		yes		yes
104		yes		yes
105	yes			no
106		yes		yes
107		yes		yes
108	yes			no
109		yes		yes
110		yes		yes
111	yes			no
112		yes		yes
113	yes			no
114		yes		yes
115		yes		yes
116		yes		yes
117		yes		yes
118	yes			no
119		yes		yes
120		yes		yes
121		yes		yes
122		yes		yes
123	yes			no
124	yes			no
125	yes			no
126		yes		yes
127		yes		yes
128		yes		yes
129	yes			no
130	yes			no
131		yes		yes
132		yes		yes
133	yes			no
134		yes		yes
135	yes			no
136	yes			no
137	yes			no
138		yes		yes
139		yes		yes
140	yes			no
141	yes			no
142	yes			no
143	yes			no
144		yes		yes
145	yes			no
146	yes			no
147	yes			no
148		yes		yes
149	yes			no
150		yes		yes
151	yes			no
152		yes		yes
153	yes			no
154		yes		yes
155	yes			no
156		yes		yes
157		yes		yes
158		yes		yes
total	59	99	0
percent	37.3418	62.6582	0
