# Supplementary material for: Metabolic network rewiring of propionate flux compensates vitamin B12 deficiency in C. elegans
Source: eLife. 2016 Jul 6;5:e17670. doi: 10.7554/eLife.17670 (PMC4951191; doi:10.7554/eLife.17670)
Supplement: Supplementary file 2. — The 836 genes that were screened as part of the metabolic RNAi library are indicated. DOI: http://dx.doi.org/10.7554/eLife.17670.012 [file elife-17670-supp2.xlsx]

## Sheet: Enzyme Domain-Containing Genes
ORF name	Clone source		ORF name	Clone source		ORF name	Clone source
T19B4.3	ORFeome		W04G3.5	ORFeome		ZC434.8	ORFeome
F42F12.4	ORFeome		C05C10.4	ORFeome		C01G8.3	ORFeome
D2063.1	ORFeome		W02A2.1	ORFeome		C01G5.5	ORFeome
F20H11.3	ORFeome		C14F11.1	ORFeome		D2085.6	ORFeome
F25H9.6	ORFeome		H24K24.3	ORFeome		C28D4.3	ORFeome
F39B2.3	ORFeome		T06D8.3	ORFeome		C50F7.4	ORFeome
W02F12.5	ORFeome		VF13D12L.3	ORFeome		F27C8.6	ORFeome
C44H4.6	ORFeome		F47G4.3	ORFeome		T07G12.11	ORFeome
LLC1.3	ORFeome		T02G5.7	ORFeome		M18.3	ORFeome
F23B12.6	ORFeome		K08B12.1	ORFeome		ZC410.3	ORFeome
F43G9.1	ORFeome		R06F6.9	ORFeome		F22B3.4	ORFeome
C03C10.3	ORFeome		F54D5.7	ORFeome		C34B2.7	ORFeome
F53A2.7	ORFeome		T03F1.3	ORFeome		F07A11.2	ORFeome
K01G5.5	ORFeome		C04C3.3	ORFeome		T23G5.1	ORFeome
F40F8.1	ORFeome		C37H5.3	ORFeome		D2013.8	ORFeome
C36B1.7	ORFeome		K04D7.3	ORFeome		K01A11.2	ORFeome
K05G3.3	ORFeome		M03A8.1	ORFeome		F23H11.9	ORFeome
T03F6.1	ORFeome		R03A10.4	ORFeome		B0524.2	ORFeome
R07E5.2	ORFeome		T25B9.9	ORFeome		C16C10.10	ORFeome
B0280.3	ORFeome		F02E9.7	ORFeome		F54C8.1	ORFeome
C35D10.6	ORFeome		K02F2.2	ORFeome		C40H1.4	ORFeome
F53F1.2	ORFeome		T27F6.6	ORFeome		B0285.8	ORFeome
F01G4.2	ORFeome		T13F2.1	ORFeome		R01H2.5	ORFeome
K01A2.5	ORFeome		T03F1.1	ORFeome		F20H11.5	ORFeome
F56H11.4	ORFeome		C46F11.2	ORFeome		Y56A3A.3	ORFeome
T04G9.4	ORFeome		T21B10.2	ORFeome		Y48A6B.7	ORFeome
M153.1	ORFeome		Y56A3A.13	ORFeome		ZC395.7	ORFeome
F55A12.4	ORFeome		C34F6.8	ORFeome		ZC395.2	ORFeome
F01D5.8	ORFeome		Y43F4B.5	ORFeome		ZK688.3	ORFeome
B0272.3	ORFeome		F57B10.3	ORFeome		Y49E10.18	ORFeome
C25A1.5	ORFeome		B0218.2	ORFeome		ZK1058.5	ORFeome
ZK430.2	ORFeome		T22G5.5	ORFeome		T05G5.5	ORFeome
C07D8.6	ORFeome		Y45F3A.3	ORFeome		Y56A3A.29	ORFeome
T21H3.1	ORFeome		T20B3.1	ORFeome		T03F6.3	ORFeome
F53C11.3	ORFeome		F01G10.1	ORFeome		T05G5.6	ORFeome
F13D12.2	ORFeome		F59G1.1	ORFeome		Y44E3A.3	ORFeome
R05G6.4	ORFeome		F52E4.1	ORFeome		F33A8.5	ORFeome
C05G5.4	ORFeome		F26D10.9	ORFeome		T22D1.3	ORFeome
T08H10.1	ORFeome		ZK829.4	ORFeome		B0395.3	ORFeome
C30H6.7	ORFeome		R11F4.1	ORFeome		Y71H10A.1	ORFeome
C47B2.6	ORFeome		H04M03.1	ORFeome		F32G8.6	ORFeome
F08C6.2	ORFeome		F13D12.4	ORFeome		F44E7.2	ORFeome
K11D2.2	ORFeome		R07H5.2	ORFeome		R04B5.5	ORFeome
T05H10.6	ORFeome		T22H6.2	ORFeome		R02D3.1	ORFeome
K12G11.3	ORFeome		T04A8.7	ORFeome		T20G5.2	ORFeome
F54F3.3	ORFeome		C01F1.3	ORFeome		Y110A7A.6	ORFeome
F41E6.5	ORFeome		F26H9.4	ORFeome		R12C12.1	ORFeome
C53B4.7	ORFeome		F19H6.4	ORFeome		T22B11.5	ORFeome
F26E4.12	ORFeome		K02D10.1	ORFeome		F36D1.1	ORFeome
C16A3.10	ORFeome		BE10.2	ORFeome		E01A2.1	ORFeome
Y111B2A.8	ORFeome		F01F1.5	ORFeome		Y110A7A.4	ORFeome
F23B12.5	ORFeome		K10D2.6	ORFeome		T05F1.10	ORFeome
T07C4.1	ORFeome		C05D11.7	ORFeome		T01H8.2	ORFeome
R05H10.5	ORFeome		B0285.7	ORFeome		T28F2.3	ORFeome
K01C8.1	ORFeome		F17C8.1	ORFeome		C31H5.1	ORFeome
K11H3.1	ORFeome		F53A2.8	ORFeome		Y71F9B.9	ORFeome
F25H2.5	ORFeome		C48B4.1	ORFeome		R05D7.4	ORFeome
H19N07.4	ORFeome		F37A4.1	ORFeome		K07A3.1	ORFeome
C47D2.2	ORFeome		D2045.9	ORFeome		T27A3.6	ORFeome
F28H7.2	ORFeome		ZK637.5	ORFeome		T26E3.2	ORFeome
ZK1127.10	ORFeome		ZK688.6	ORFeome		T10E9.9	ORFeome
C31C9.2	ORFeome		T04A8.5	ORFeome		C30F12.7	ORFeome
C36A4.9	ORFeome		ZK637.10	ORFeome		R06C1.2	ORFeome
T03G11.4	ORFeome		Y71D11A.3	ORFeome		F27D4.5	ORFeome
ZC373.5	ORFeome		ZK632.4	ORFeome		F57C9.1	ORFeome
C05C10.3	ORFeome		T21C12.2	ORFeome		F10G8.9	ORFeome
R151.2	ORFeome		W05G11.6	ORFeome		C46H11.2	ORFeome
Y62E10A.6	ORFeome		F23H11.2	ORFeome		F56H6.5	ORFeome
F37C4.6	ORFeome		ZK1058.1	ORFeome		C32E8.6	ORFeome
M04B2.4	ORFeome		ZK112.1	ORFeome		C15A11.7	ORFeome
C02D5.1	ORFeome		F23H11.2	ORFeome		C55B7.4	ORFeome
F53C3.12	ORFeome		ZK370.4	ORFeome		C32E12.2	ORFeome
F54G8.2	ORFeome		M88.1	ORFeome		C15A11.4	ORFeome
E02H9.5	ORFeome		C27D8.4	ORFeome		C44E4.3	ORFeome
C05D2.4	ORFeome		C06A12.5	ORFeome		C37A2.3	ORFeome
F42G9.5	ORFeome		C43E11.7	ORFeome		Y6B3B.5	ORFeome
VF13D12L.1	ORFeome		F41D3.5	ORFeome		B0205.6	ORFeome
E04F6.5	ORFeome		H23N18.4	ORFeome		T05E7.1	ORFeome
ZK643.2	ORFeome		Y37H9A.6	ORFeome		F53F10.2	ORFeome
ZK1058.3	ORFeome		B0041.6	ORFeome		C12C8.2	ORFeome
F01F1.10	ORFeome		D2030.5	ORFeome		C10H11.6	ORFeome
F35G12.1	ORFeome		Y23H5A.8	ORFeome		Y110A7A.6	ORFeome
ZK370.5	ORFeome		C06A5.4	ORFeome		F54D7.2	ORFeome
B0361.5	ORFeome		Y106G6E.4	ORFeome		W03D8.8	ORFeome
F59B2.3	ORFeome		C32E8.9	ORFeome		F14B4.2	ORFeome
C56G2.6	ORFeome		F32H2.6	ORFeome		R06C7.5	ORFeome
F25B5.6	ORFeome		ZK909.3	ORFeome		F47G6.2	ORFeome
F09F7.7	ORFeome		Y87G2A.14	ORFeome		C10H11.3	ORFeome
B0285.9	ORFeome		Y47G6A.22	ORFeome		F56C11.6	ORFeome
F57B9.4	ORFeome		R119.3	ORFeome		T10B11.2	ORFeome
B0361.7	ORFeome		Y106G6H.4	ORFeome		F57B10.7	ORFeome
F25B5.3	ORFeome		F09C3.2	ORFeome		R06C7.3	ORFeome
B0303.3	ORFeome		Y110A7A.7	ORFeome		Y87G2A.8	ORFeome
K03H1.1	ORFeome		Y32H12A.6	ORFeome		C10H11.5	ORFeome
F37C12.7	ORFeome		C54G6.1	ORFeome		C10H11.4	ORFeome
F01F1.6	ORFeome		C24A11.9	ORFeome		F41D3.4	ORFeome
D2030.1	ORFeome		Y46G5A.19	ORFeome		W07A12.7	ORFeome
H25P06.1	ORFeome		ZK1290.5	ORFeome		ZK669.4	ORFeome
C53D5.5	ORFeome		F01D5.7	ORFeome		R153.1	ORFeome
T09E11.7	ORFeome		E04F6.7	ORFeome		Y48B6A.12	ORFeome
Y65B4BL.5	ORFeome		Y39G8B.2	ORFeome		C34C6.4	ORFeome
F14B6.5	ORFeome		B0432.5	ORFeome		C38C6.2	ORFeome
R11A5.4	ORFeome		T25D3.3	ORFeome		C08H9.3	ORFeome
Y48G9A.10	ORFeome		B0491.1	ORFeome		K01C8.3	ORFeome
T04D3.3	ORFeome		C34C6.5	ORFeome		R53.7	ORFeome
Y40B1B.6	ORFeome		F27E5.1	ORFeome		K09E4.4	ORFeome
F54C1.1	ORFeome		C33F10.7	ORFeome		ZK430.8	ORFeome
F56H6.12	ORFeome		K05F1.3	ORFeome		F37B12.2	ORFeome
C09D4.4	ORFeome		T13B5.3	ORFeome		R05F9.6	ORFeome
C34G6.2	ORFeome		M05D6.7	ORFeome		C16C8.2	ORFeome
Y106G6H.5	ORFeome		Y46G5A.21	ORFeome		ZK1127.2	ORFeome
C48E7.8	ORFeome		C06A8.1	ORFeome		C33C12.3	ORFeome
Y4C6B.6	ORFeome		Y53F4B.18	ORFeome		DH11.1	ORFeome
T04D3.4	ORFeome		Y46G5A.24	ORFeome		C01G6.6	ORFeome
C54G6.1	ORFeome		F49E12.1	ORFeome		ZK177.8	ORFeome
C27A12.9	ORFeome		Y46G5A.31	ORFeome		R06A4.8	ORFeome
K10B3.8	ORFeome		C23H3.7	ORFeome		F52H3.1	ORFeome
Y54E10BR.1	ORFeome		R53.2	ORFeome		W09B6.1	ORFeome
K02F2.1	ORFeome		K10B4.1	ORFeome		F32A5.2	ORFeome
F11E6.1	ORFeome		F58G1.5	ORFeome		R05F9.12	ORFeome
F55B11.1	ORFeome		F14E5.5	ORFeome		C17G10.8	ORFeome
C05C8.7	ORFeome		Y25C1A.13	ORFeome		R03D7.1	ORFeome
K06A4.5	ORFeome		F53C3.13	ORFeome		C13B4.1	ORFeome
C27H5.1	ORFeome		C23H3.9	ORFeome		Y48G10A.1	ORFeome
Y38A8.1	ORFeome		C09E8.2	ORFeome		D2013.9	ORFeome
F43E2.5	ORFeome		C15F1.6	ORFeome		T25G3.4	ORFeome
F37H8.3	ORFeome		C30G12.2	ORFeome		C45G3.3	ORFeome
R07G3.2	ORFeome		T06D8.6	ORFeome		K01G5.9	ORFeome
Y46G5A.5	ORFeome		Y110A2AL.14	ORFeome		F56G4.5	ORFeome
F58A6.1	ORFeome		C32D5.12	ORFeome		F54D5.12	ORFeome
Y17G7B.3	ORFeome		T05C12.3	ORFeome		R09H10.3	ORFeome
T23F4.3	ORFeome		W09H1.5	ORFeome		F49E8.4	ORFeome
Y38E10A.10	ORFeome		F57C2.5	ORFeome		R10H10.6	ORFeome
D1022.3	ORFeome		T14D7.1	ORFeome		T09A12.2	ORFeome
B0491.7	ORFeome		B0286.3	ORFeome		JC8.4	ORFeome
F49E12.9	ORFeome		ZK1320.9	ORFeome		C06E4.3	ORFeome
B0228.7	ORFeome		D2089.5	ORFeome		ZK1251.3	ORFeome
W01C9.4	ORFeome		T02G5.8	ORFeome		T04B2.6	ORFeome
Y53F4B.2	ORFeome		ZK945.1	ORFeome		Y57G11C.21	ORFeome
T13B5.5	ORFeome		M05D6.4	ORFeome		Y55F3BR.5	ORFeome
E04F6.3	ORFeome		F28A10.6	ORFeome		C06E4.6	ORFeome
T02G5.13	ORFeome		C01G6.7	ORFeome		Y57G11C.3	ORFeome
H41C03.2	ORFeome		M28.6	ORFeome		F01G4.5	ORFeome
F13H8.9	ORFeome		E02H1.3	ORFeome		ZK829.1	ORFeome
F56H11.3	ORFeome		C06E7.1	ORFeome		D1054.1	ORFeome
ZK550.5	ORFeome		H04M03.3	ORFeome		Y105E8A.4	ORFeome
F08G5.2	ORFeome		F13B12.4	ORFeome		K08B12.3	ORFeome
B0035.16	ORFeome		ZK829.7	ORFeome		C55A6.5	ORFeome
F38E11.3	ORFeome		C55F2.1	ORFeome		F20G2.1	ORFeome
C45E5.1	ORFeome		Y105C5B.9	ORFeome		F43H9.1	ORFeome
F33D4.4	ORFeome		F30B5.4	ORFeome		C55A6.7	ORFeome
T25B9.1	ORFeome		C10C5.4	ORFeome		C55A6.6	ORFeome
ZK617.2	ORFeome		C10C5.5	ORFeome		C55A6.4	ORFeome
Y54G2A.17	ORFeome		T13A10.11	ORFeome		F20G2.2	ORFeome
C50F7.6	ORFeome		T12G3.4	ORFeome		R05D8.7	ORFeome
C06A6.4	ORFeome		C06E7.3	ORFeome		D1054.8	ORFeome
C10C5.3	ORFeome		Y37E11B.5	ORFeome		T05H4.4	ORFeome
F01G10.3	ORFeome		F01D4.2	ORFeome		W03F9.9	ORFeome
Y45F10D.11	ORFeome		C50F7.10	ORFeome		K07C5.2	ORFeome
D2096.4	ORFeome		R09E10.3	ORFeome		F26D2.15	ORFeome
Y37E11AR.4	ORFeome		C24F3.4	ORFeome		F25D1.5	ORFeome
Y105C5B.28	ORFeome		C33H5.18	ORFeome		R05D8.9	ORFeome
F01G10.2	ORFeome		ZK593.1	ORFeome		R08H2.1	ORFeome
F01D4.8	ORFeome		C28D4.2	ORFeome		T01G6.1	ORFeome
T25B9.7	ORFeome		K08C7.2	ORFeome		F11A5.12	ORFeome
C47E12.8	ORFeome		F21D5.1	ORFeome		F59E11.2	ORFeome
K08B4.3	ORFeome		F58H7.2	ORFeome		T05H4.5	ORFeome
Y7A9A.1	ORFeome		K08C7.5	ORFeome		C06B3.4	ORFeome
C01B10.4	ORFeome		B0218.1	ORFeome		W02F12.2	ORFeome
K08B4.4	ORFeome		ZC416.6	ORFeome		Y73C8B.1	ORFeome
C08F11.8	ORFeome		W03G1.7	ORFeome		F22F7.6	ORFeome
H23L24.5	ORFeome		B0035.5	ORFeome		C47A10.5	ORFeome
D2024.3	ORFeome		T14G10.1	ORFeome		K12B6.3	ORFeome
R11A8.3	ORFeome		C06G3.9	ORFeome		F59A7.9	ORFeome
H12I19.4	ORFeome		F21D5.3	ORFeome		F10D2.9	ORFeome
K08F4.9	ORFeome		F32B6.2	ORFeome		C50B8.3	ORFeome
T23G4.4	ORFeome		F58F9.7	ORFeome		K07B1.4	ORFeome
K09E10.2	ORFeome		F36H1.6	ORFeome		Y46H3D.6	ORFeome
ZK809.2	ORFeome		F13H10.4	ORFeome		T05H4.1	ORFeome
B0001.4	ORFeome		T26C12.1	ORFeome		C53A3.2	ORFeome
F37C4.3	ORFeome		ZK829.2	ORFeome		ZK262.3	ORFeome
Y57G11C.11	ORFeome		F15E6.6	ORFeome		W01A11.2	ORFeome
ZK550.6	ORFeome		Y54E5A.1	ORFeome		F22F7.5	ORFeome
C33A12.7	ORFeome		K11C4.4	ORFeome		C37H5.2	ORFeome
R07H5.8	ORFeome		Y37E11C.1	ORFeome		F46B6.8	ORFeome
F38H4.8	ORFeome		T16G1.10	ORFeome		Y44A6D.5	ORFeome
Y55F3AM.10	ORFeome		F45F2.9	ORFeome		ZK6.7	ORFeome
T20D3.8	ORFeome		W02G9.1	ORFeome		F49H6.5	ORFeome
F41H10.8	ORFeome		T20B3.7	ORFeome		W06H8.2	ORFeome
D2024.2	ORFeome		Y105E8B.5	ORFeome		C12D8.5	ORFeome
K02D7.1	ORFeome		T01G6.10	ORFeome		AC3.8	ORFeome
C06G3.5	ORFeome		F44C4.5	ORFeome		T19H12.9	ORFeome
F17C11.7	ORFeome		K04A8.5	ORFeome		F59F4.4	ORFeome
T19H12.1	ORFeome		T11F9.11	ORFeome		F46H5.8	ORFeome
K07B1.2	ORFeome		F32D1.5	ORFeome		F35C8.5	ORFeome
C04F5.7	ORFeome		F59A1.10	ORFeome		F02C12.2	ORFeome
D1054.13	ORFeome		R04B5.6	ORFeome		C03F11.2	ORFeome
H23N18.3	ORFeome		ZK287.7	ORFeome		F46G10.4	ORFeome
T03D3.1	ORFeome		F53F4.5	ORFeome		T27A10.3	ORFeome
H23N18.2	ORFeome		R11G11.14	ORFeome		ZC8.1	ORFeome
C24G6.6	ORFeome		F20D6.11	ORFeome		C44C1.5	ORFeome
F39G3.1	ORFeome		K08H10.4	ORFeome		F16F9.4	ORFeome
T19H12.10	ORFeome		C03A7.11	ORFeome		R04B3.2	ORFeome
F29F11.1	ORFeome		F28F8.2	ORFeome		Y41G9A.3	ORFeome
AC3.7	ORFeome		W05E10.4	ORFeome		F45E6.4	ORFeome
F10D2.11	ORFeome		T08B1.3	ORFeome		K05B2.4	ORFeome
ZC443.6	ORFeome		H24K24.5	ORFeome		C23H4.2	ORFeome
M04G12.3	ORFeome		W01A11.1	ORFeome		T20F7.7	ORFeome
C44H9.1	ORFeome		F25B4.6	ORFeome		F28H6.3	ORFeome
T01G5.2	ORFeome		R07B7.11	ORFeome		C55B6.1	ORFeome
F25G6.6	ORFeome		ZC455.4	ORFeome		F52H2.6	ORFeome
R03H4.1	ORFeome		C52A10.1	ORFeome		Y71H10A.2	ORFeome
ZC376.2	ORFeome		F11A3.1	ORFeome		F15A2.2	ORFeome
B0238.1	ORFeome		F09F3.5	ORFeome		F55F3.2	ORFeome
K11G9.2	ORFeome		ZC455.6	ORFeome		B0310.5	ORFeome
W02H5.8	ORFeome		F52F10.3	ORFeome		C03B1.7	ORFeome
C50H11.1	ORFeome		W01A11.5	ORFeome		C44C1.2	ORFeome
H23N18.1	ORFeome		AH10.1	ORFeome		F56F10.3	ORFeome
Y39H10A.2	ORFeome		K07C11.4	ORFeome		C29F7.3	ORFeome
F08F3.2	ORFeome		C50B6.7	ORFeome		F09E10.3	ORFeome
F10D2.6	ORFeome		C52E4.5	ORFeome		K07E3.3	ORFeome
R03H4.6	ORFeome		T08B1.6	ORFeome		C37E2.1	ORFeome
F43H9.2	ORFeome		F25C8.4	ORFeome		F46H5.3	ORFeome
B0222.4	ORFeome		F09F3.9	ORFeome		T08G2.3	ORFeome
F52F10.4	ORFeome		Y76A2B.3	ORFeome		F08C6.4	ORFeome
T03D8.6	ORFeome		W03F9.4	ORFeome		F53B1.4	ORFeome
Y105E8B.9	ORFeome		C29F3.1	ORFeome		C01C10.3	ORFeome
T02B5.1	ORFeome		D2023.2	ORFeome		F42D1.2	ORFeome
F54F3.4	ORFeome		PAR2.4	ORFeome		ZK455.4	ORFeome
Y105E8A.10	ORFeome		C50F4.2	ORFeome		C49F5.1	ORFeome
C13C4.4	ORFeome		B0365.1	ORFeome		K10C2.4	ORFeome
R05D8.8	ORFeome		F45E1.4	ORFeome		T25G12.5	ORFeome
R09B5.6	ORFeome		C31A11.5	ORFeome		C54D1.4	ORFeome
Y73C8B.3	ORFeome		K09H11.1	ORFeome		Y70D2A.2	ORFeome
Y60A3A.7	ORFeome		F58H1.1	ORFeome		Y71H10B.1	ORFeome
C45B11.3	ORFeome		C39D10.3	ORFeome		F01E11.1	ORFeome
F28H7.3	ORFeome		W06B3.1	ORFeome		C54G7.2	ORFeome
C10F3.2	ORFeome		F27D9.6	ORFeome		Y7A5A.1	ORFeome
K07B1.5	ORFeome		B0272.4	ORFeome		H13N06.4	ORFeome
C01G10.7	ORFeome		F42F12.3	ORFeome		M02D8.4	ORFeome
C17G1.3	ORFeome		ZC455.5	ORFeome		F46E10.10	Ahringer
ZC506.3	ORFeome		C46C11.1	ORFeome		F47B10.1	Ahringer
T03G6.3	ORFeome		C56G3.2	ORFeome		F53F1.3	Ahringer
T24C12.3	ORFeome		C52B9.1	ORFeome		F54A3.4	Ahringer
R07E4.4	ORFeome		R03G5.5	ORFeome		F54D8.3	Ahringer
K03A1.5	ORFeome		C34F6.4	ORFeome		F56D1.5	Ahringer
ZC506.1	ORFeome		B0285.5	ORFeome		F56D12.1	Ahringer
F15A8.6	ORFeome		T07C4.4	ORFeome		F59B8.2	Ahringer
C46F4.2	ORFeome		F21F3.1	ORFeome		H14A12.2	Ahringer
T14F9.3	ORFeome		K07C5.7	ORFeome		K04F1.15	Ahringer
F47B10.2	ORFeome		C10G11.5	ORFeome		K06A5.6	Ahringer
C42D8.3	ORFeome		T24D1.1	ORFeome		K10H10.2	Ahringer
C52B9.9	ORFeome		T08B2.7	ORFeome		K12G11.4	Ahringer
F49E10.2	ORFeome		K10H10.3	ORFeome		R05D8.10	Ahringer
D1009.1	ORFeome		F12A10.3	ORFeome		T15B7.2	Ahringer
F09B9.1	ORFeome		T02G5.4	ORFeome		T25G12.7	Ahringer
F59F4.1	ORFeome		Y51H4A.7	ORFeome		W06D12.3	Ahringer
ZK455.1	ORFeome		E04A4.4	ORFeome		Y32H12A.3	Ahringer
D1005.1	ORFeome		F13H10.4	ORFeome		Y69F12A.2	Ahringer
F39B1.1	ORFeome		F55C5.2	ORFeome		Y6B3B.11	Ahringer
C33G3.4	ORFeome		F10C2.5	ORFeome
K09C8.5	ORFeome		C14C11.3	ORFeome
T26A5.7	ORFeome		F35B12.2	ORFeome
F42G8.6	ORFeome		F13H6.4	ORFeome
C02C2.5	ORFeome		C03A3.3	ORFeome
ZK637.9	ORFeome		B0250.5	Ahringer
K02A4.1	ORFeome		C02B10.1	Ahringer
C29E4.8	ORFeome		C05C10.3	Ahringer
T24D1.4	ORFeome		C05D11.11	Ahringer
Y42G9A.4	ORFeome		C08B6.1	Ahringer
ZK484.6	ORFeome		C28C12.9	Ahringer
C32F10.8	ORFeome		D2063.1	Ahringer
C26D10.3	ORFeome		E04F6.5	Ahringer
F30F8.2	ORFeome		F08A8.1	Ahringer
C49D10.4	ORFeome		F08A8.3	Ahringer
K10H10.6	ORFeome		F08A8.4	Ahringer
F55A12.3	ORFeome		F08F3.4	Ahringer
Y94H6A.4	ORFeome		F08F8.2	Ahringer
C17C3.12	ORFeome		F09F7.4	Ahringer
F11G11.9	ORFeome		F11E6.5	Ahringer
Y76B12C.6	ORFeome		F18E3.7	Ahringer
K04A8.10	ORFeome		F22B8.6	Ahringer
B0238.13	ORFeome		F23B12.5	Ahringer
F36G9.12	ORFeome		F25B4.1	Ahringer
F55C5.6	ORFeome		F29G9.6	Ahringer
T05H4.13	ORFeome		F41H10.7	Ahringer
ZC443.1	ORFeome		F42A8.2	Ahringer
F55A11.5	ORFeome		F45H10.1	Ahringer
