# Supplementary material for: Metabolic network rewiring of propionate flux compensates vitamin B12 deficiency in C. elegans
Source: eLife. 2016 Jul 6;5:e17670. doi: 10.7554/eLife.17670 (PMC4951191; doi:10.7554/eLife.17670)
Supplement: Supplementary file 3. — DOI: http://dx.doi.org/10.7554/eLife.17670.013 [file elife-17670-supp3.xlsx]

## Sheet: Sheet1
	Biochemical evidence - in vitro enzyme assay						Genetic evidence - patient mutation metabolomics
	Valine Breakdown	Isoleucine Breakdown	GABA breakdown	Propionate Oxidation			Valine Breakdown	Isoleucine Breakdown	GABA breakdown	Propionate Oxidation
ACADSB	Vockley 2000, PMID: 10989435	Binzak 1998, PMID: 9507094; Vockley 2000, PMID: 10989435				ACADSB		Korman 2005, PMID: 15615815
ECHS1	Yamada 2015, PMID: 26251176			Yamada 2015, PMID: 26251176		ECHS1	Peters 2014, PMID: 25125611			Peters 2014, PMID: 25125611
HIBCH	Hawes 1996, PMID: 8824301			Hawes 1996, PMID: 8824301		HIBCH	Peters 2014, PMID: 25125611			Peters 2014, PMID: 25125611
ADHFE1			Kardon 2006, PMID: 16616524			ADHFE1
ALDH6A1						ALDH6A1	Sass 2012 PMID: 21863277			Marcadier, PMID: 23835272
