# Supplementary material for: Metabolic network rewiring of propionate flux compensates vitamin B12 deficiency in C. elegans
Source: eLife. 2016 Jul 6;5:e17670. doi: 10.7554/eLife.17670 (PMC4951191; doi:10.7554/eLife.17670)
Supplement: Supplementary file 4. — DOI: http://dx.doi.org/10.7554/eLife.17670.014 [file elife-17670-supp4.xlsx]

## Sheet: Sheet1
C. elegans
gene	genotyping primers
	Forward	Reverse
acdh-1	CTTCCAGCTAATGGGTGTTCATGTTCC	CGCCATTGCAGCTTCTCGTAC
hphd-1	TCGACACGACGAAGGCTG	AAGCCGGCAATATTTAAACG
alh-8	TTCAATGTTCGCGTGTATTTTG	TCAGCGAGCTTCTTCATGT
pcca-1	GGGGCAACAAAACAGGGTGGTG	CGAGCTTGAGAAGGCTGGAGC
C. elegans
gene	qPCR primers
	Forward	Reverse
ama-1 (control)	AATATCTCGCAGGTTATCGC	GTGTACGATGACGGAAACC
act-1 (control)	CTCTTGCCCCATCAACCATG	CTTGCTTGGAGATCCACATC
acdh-1	GCAAATGCAGATCCTAGCC	GTTTGTCTTCCTCCTTATCTACAG
ech-6	TCGGAGCAATTGTGATTACTG	CGAACTCGTTATTGGTCATCTC
hach-1	CACAATGGAGTATCGTCTCAC	TTGTCAACGAGAATGGCTC
hphd-1	GATATTCCGAACAATGCCAG	TCCAAAGTCTCGCATATAACC
alh-8	TTTGAGAATGGAAACTTCGTGG	GAAGATTTCTTCTCTGTAGCAAGTC
H. sapiens
gene	qPCR primers
	Forward	Reverse
actin (control)	TCCCTGGAGAAGAGCTACGA	AGCACTGTGTTGGCGTACAG
GAPDH (control)	AATCCCATCACCATCTTCCA	TGGACTCCACGACGTACTCA
ACADSB	TATGCATCAGAGATTGCAGG	AGGGTAATCTTTGGTGTAGC
ECHS1	GAAGACCTTCGAGGAGGAC	GATATCAGCTCCAGCTGCA
HIBCH	ATTACAATGGGTGGGGGAGT	CCAAGTTTTCCTTGGAGTCG
ADHFE1	GAGTCATACACCACCCTGCC	CTGACAGCCCTCTTCAGATAC
ALDH1A6	AATGTTCTCATTCACCGGC	GTGTAGAATTGGATGCCCTG
